# Supplementary material for: Hepatitis C Virus Infection in Phenotypically Distinct Huh7 Cell Lines
Source: PubMed Central journal article supplement (PMC2720605; doi:10.1371/journal.pone.0006561), 2009-08-10
Supplement: pone.0006561.s002.pdf [file pone.0006561.s002.pdf]

**Supplementary Table 1. Primer Sequences for RTqPCR**

| <b>Gene</b>                   | <b>Accession No.</b> | <b>Forward Primer</b>   | <b>Reverse Primer</b>   |
|-------------------------------|----------------------|-------------------------|-------------------------|
| JFH-1                         | AB047639             | TCTGCGGAACCGGTGAGTA     | TCAGGCAGTACCACAAGGC     |
| GAPDH                         | NM_X002046           | GAAGGTGAAGGTCGGAGTC     | GAAGATGGTGATGGGATTTC    |
| EGFP                          | U55762               | GCAAAGACCCCAACGAGAAG    | TCACGAACTCCAGCAGGACC    |
| ISG15                         | NM_005101            | CAGCGAACTCATCTTTGCCAGTA | CCAGCATCTTCACCGTCAGG    |
| ISG56                         | NM_001001887         | GGGCAGACTGGCAGAAGC      | TATAGCGGAAGGGATTTGAAAGC |
| MxA                           | NM_002462            | CCAGCATCTTCACCGTCAGG    | CCCTTCTTCAGGTGGAACAC    |
| Transthyretin (TTR)           | NM_000371            | CCGGTGAATCCAAGTGTCT     | GCACGGCCACATTGATG       |
| HNF4 $\alpha$                 | Z49825               | ACATTCGGGCGAAGAAGATT    | ACTTGGCCCACTCAACGAG     |
| $\alpha$ 1-antitrypsin (A1AT) | M11465               | TGCTGCCCAGAAGACAGATA    | GGCGGTATAGGCTGAAGG      |
